# Supplementary material for: Curved 2D WS2 nanostructures: nanocasting and silent phonon mode
Source: Royal Society of Chemistry journal article supplement (doi:10.1039/d0nr01130d), 2020-01-01
Supplement: d0nr01130d1.pdf [file d0nr01130d1.pdf]

## Supporting Information

### **Curved 2D WS<sub>2</sub> Nanostructures: Nanocasting and Silent Phonon Mode**

Rui Hao,<sup>a</sup> Lingling Zhang,<sup>a</sup> Lei Zhang,<sup>\*a</sup> Hongjun You,<sup>b</sup> Jie Fan<sup>c</sup> and Jixiang Fang<sup>\*a</sup>

<sup>a</sup>*Key Laboratory of Physical Electronics and Devices of Ministry of Education, School of Electronic Science and Engineering, Xi'an Jiaotong University, Xi'an 710049, China.*

*E-mail: jxfang@mail.xjtu.edu.cn; eiezhanglei@xjtu.edu.cn*

<sup>b</sup>School of Science, Xi'an Jiaotong University, Xi'an 710049, China

<sup>c</sup>Prof. J. Fan, Key Lab of Applied Chemistry of Zhejiang Province, Department of Chemistry, Zhejiang University, Hangzhou 310027, China

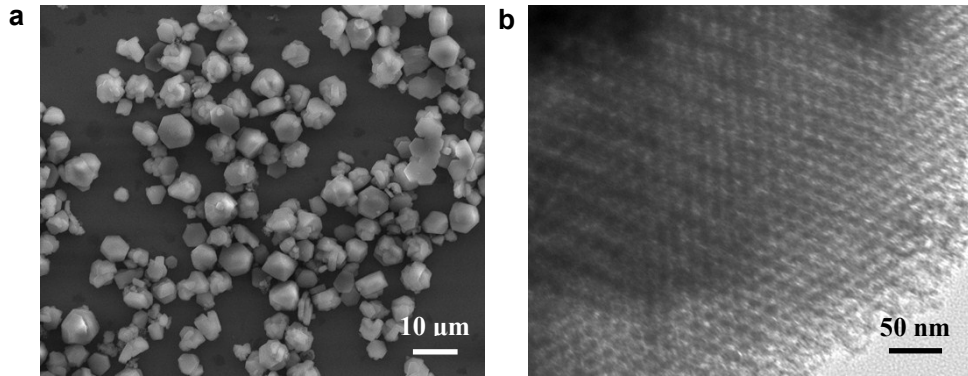

Figure S1. (a) SEM and (b) TEM image of the EP-FDU-12 mesoporous silica template.

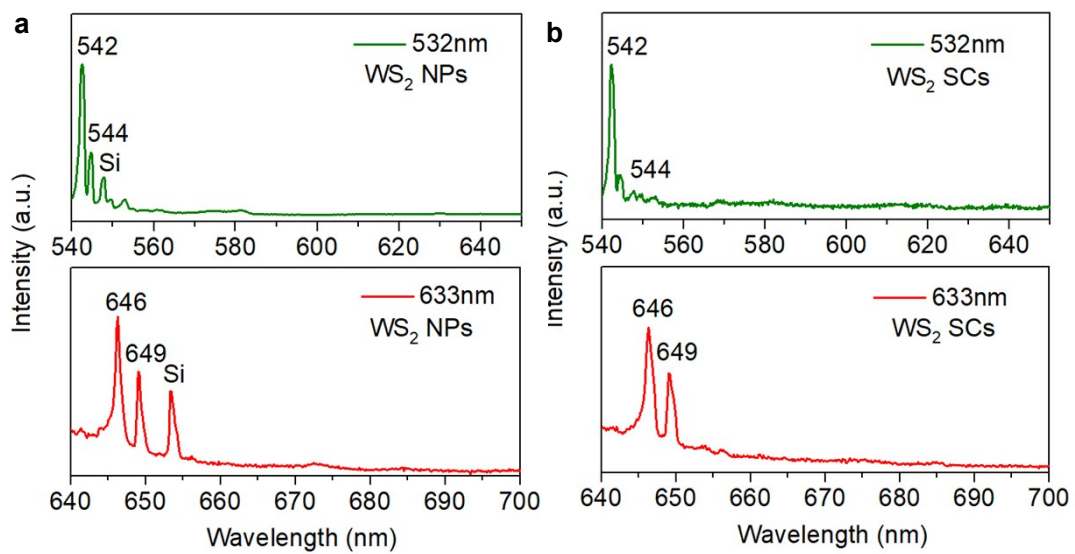

Figure S2. Photoluminescence spectra of (a)  $\text{WS}_2$  NPs and (b)  $\text{WS}_2$  SCs under the excitation of 532 (upper) and 633 nm (lower) lasers. The peaks at 542 and 544 nm under the excitation of 532 nm lasers and 646 and 649 nm under the excitation of 633 nm lasers are  $\text{WS}_2$  Raman peaks.

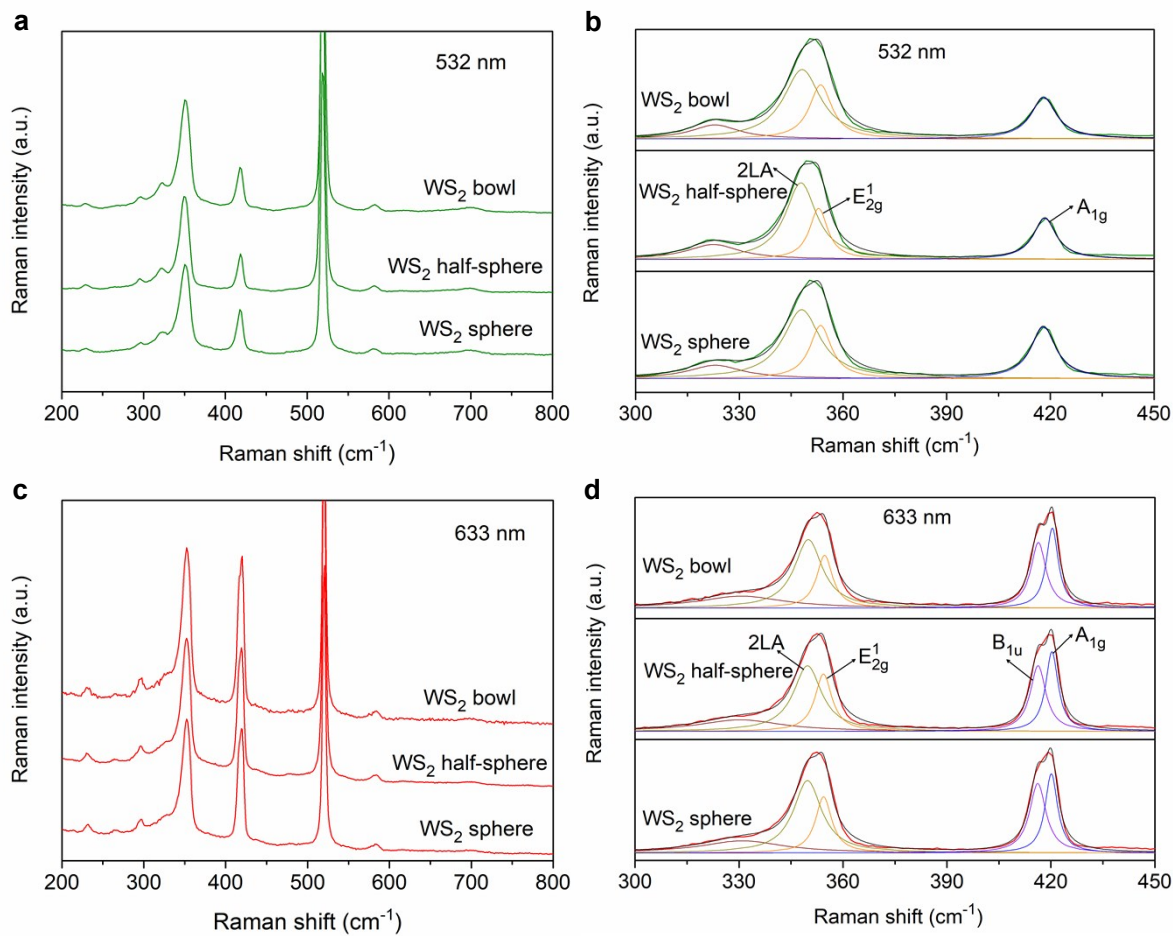

Figure S3. Raman spectra of WS<sub>2</sub> bowl, WS<sub>2</sub> half-sphere, WS<sub>2</sub> sphere excited by (a)-(b) 532 and (c)-(d) 633 nm laser. (b) and (d) are the Raman spectra at the zoom-in frequency range with detailed fitting curves using Lorentzian function.

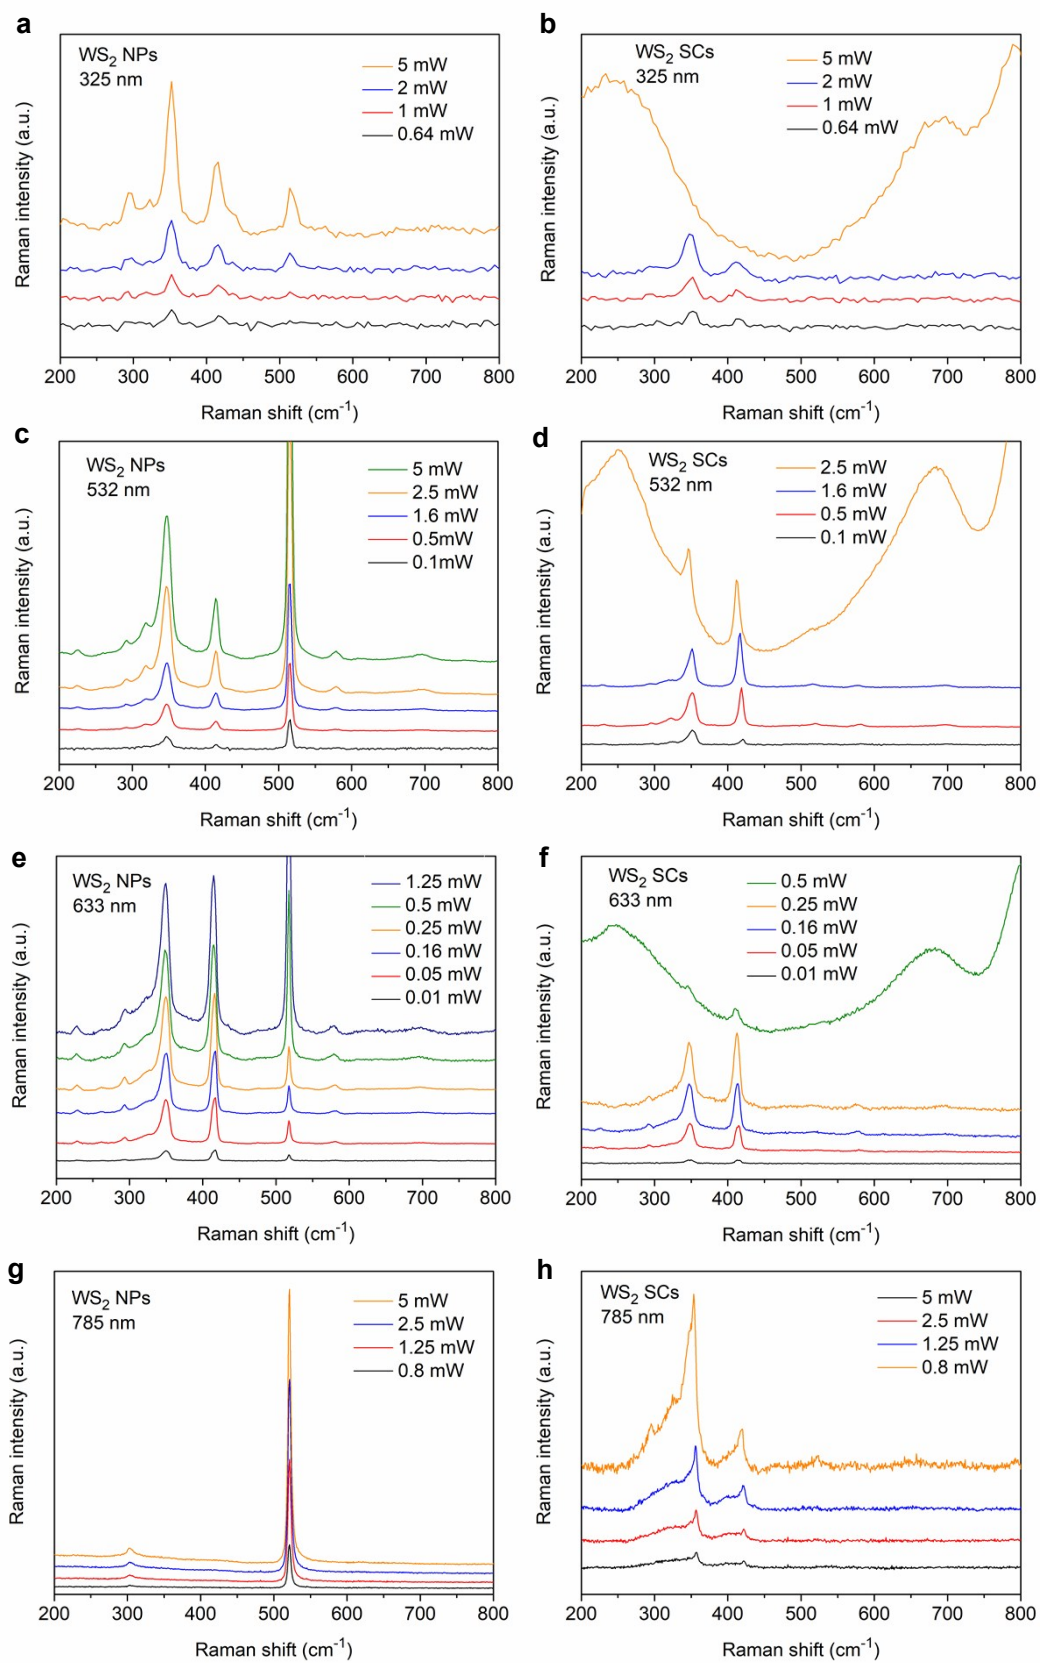

Figure S4. Raman spectra of WS<sub>2</sub> NPs and WS<sub>2</sub> SCs excited by (a)-(b) 325 nm laser, (c)-(d) 532 nm laser, (e)-(f) 633 nm laser, and (g)-(h) 785 nm laser using different laser powers.

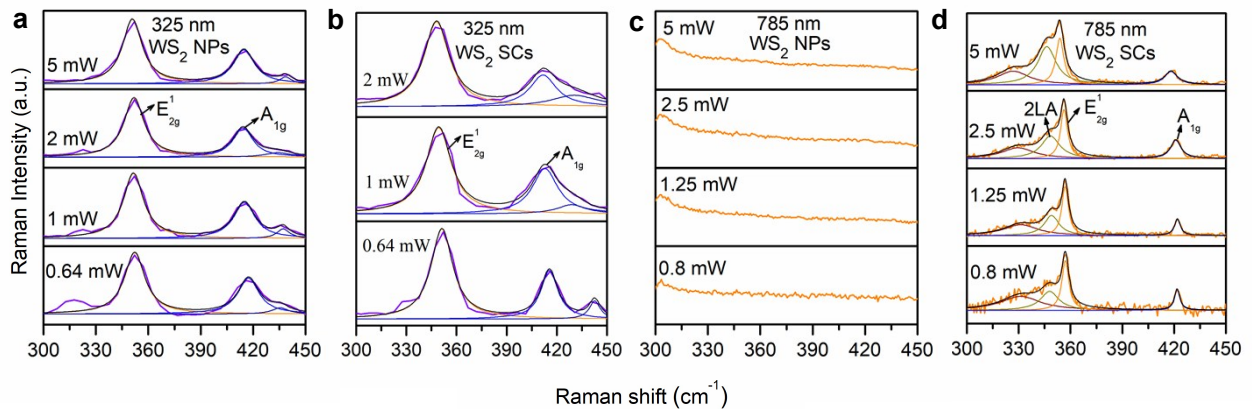

Figure S5. Raman spectra of WS<sub>2</sub> NPs and WS<sub>2</sub> SCs excited by (a)-(b) 325 nm laser and (c)-(d) 785 nm laser using different laser powers. Detailed features of the Raman peaks are fitted using the Lorentzian function.

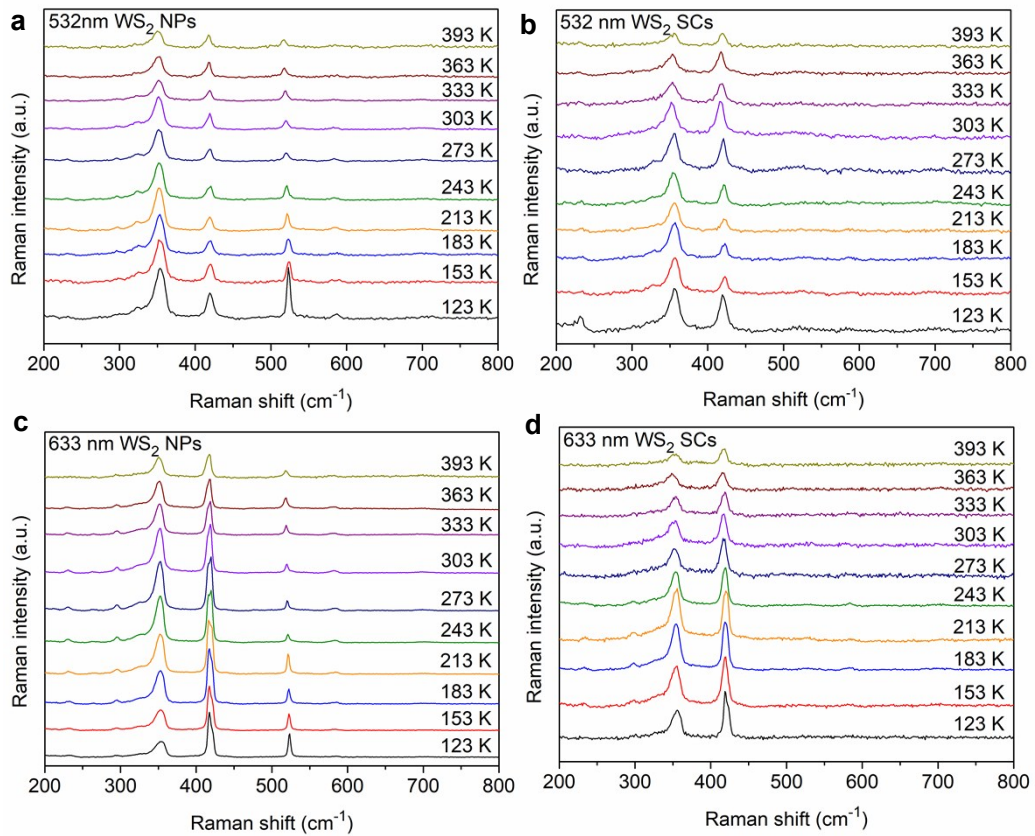

Figure S6. Dependence of Raman spectra of WS<sub>2</sub> NPs and WS<sub>2</sub> SCs excited by (a)-(b) 532 nm laser and (c)-(d) 633 nm laser on the temperature.

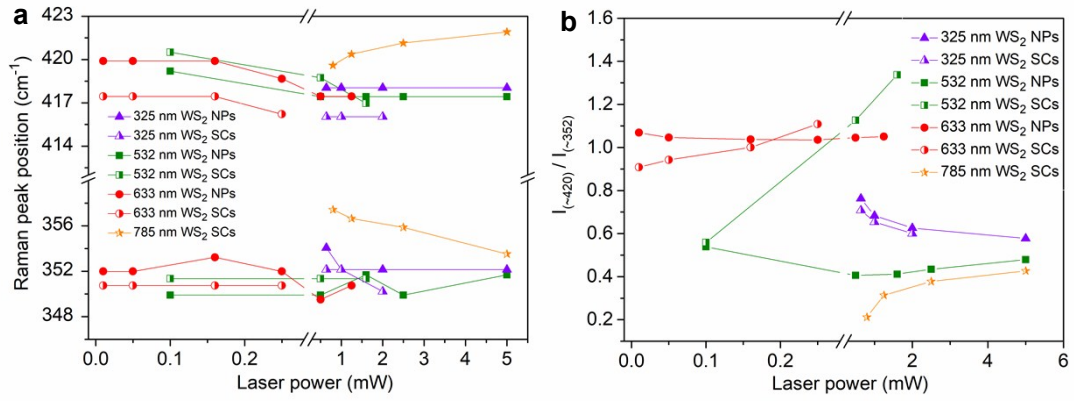

Figure S7. (a) Peak position and (b) intensity ratio of the two prominent Raman peaks of WS<sub>2</sub> SCs and WS<sub>2</sub> NPs under the excitation of 325, 532, 633 and 785 nm lasers.

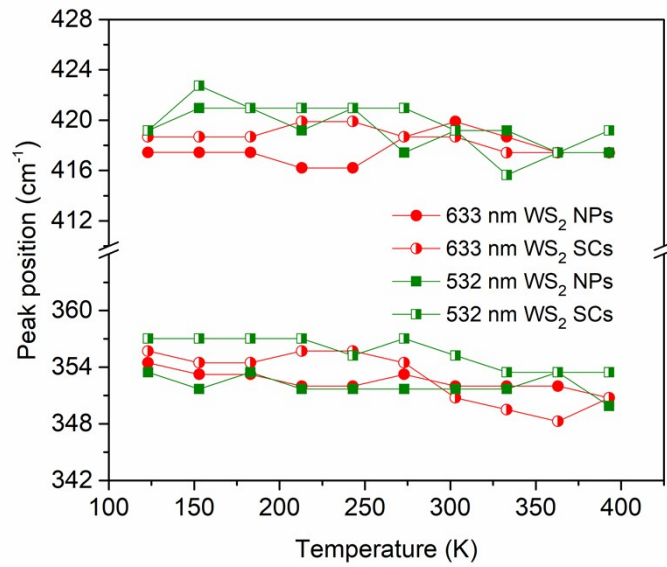

Figure S8. Dependence of the Raman peak position of the two prominent Raman peaks of WS<sub>2</sub> SCs and WS<sub>2</sub> NPs on the temperature under the excitation of 532 and 633 nm lasers. Here peak position of those combined modes (containing two peaks) are just plot for reference.
